# Supplementary material
Source: MDPI journal article supplement (https://www.mdpi.com/2073-4344/9/3/235)
Supplement: s1 [file s1]

## Supporting information

### Dye-sensitized photocatalyst of sepiolite for organic dye degradation

Chitiphon Chuaicham, Radheshyam Pawar, Keiko Sasaki\*

Department of Earth Resources Engineering, Faculty of Engineering, Kyushu University,

744 Motooka, Nishiku, Fukuoka 819-0395, Japan

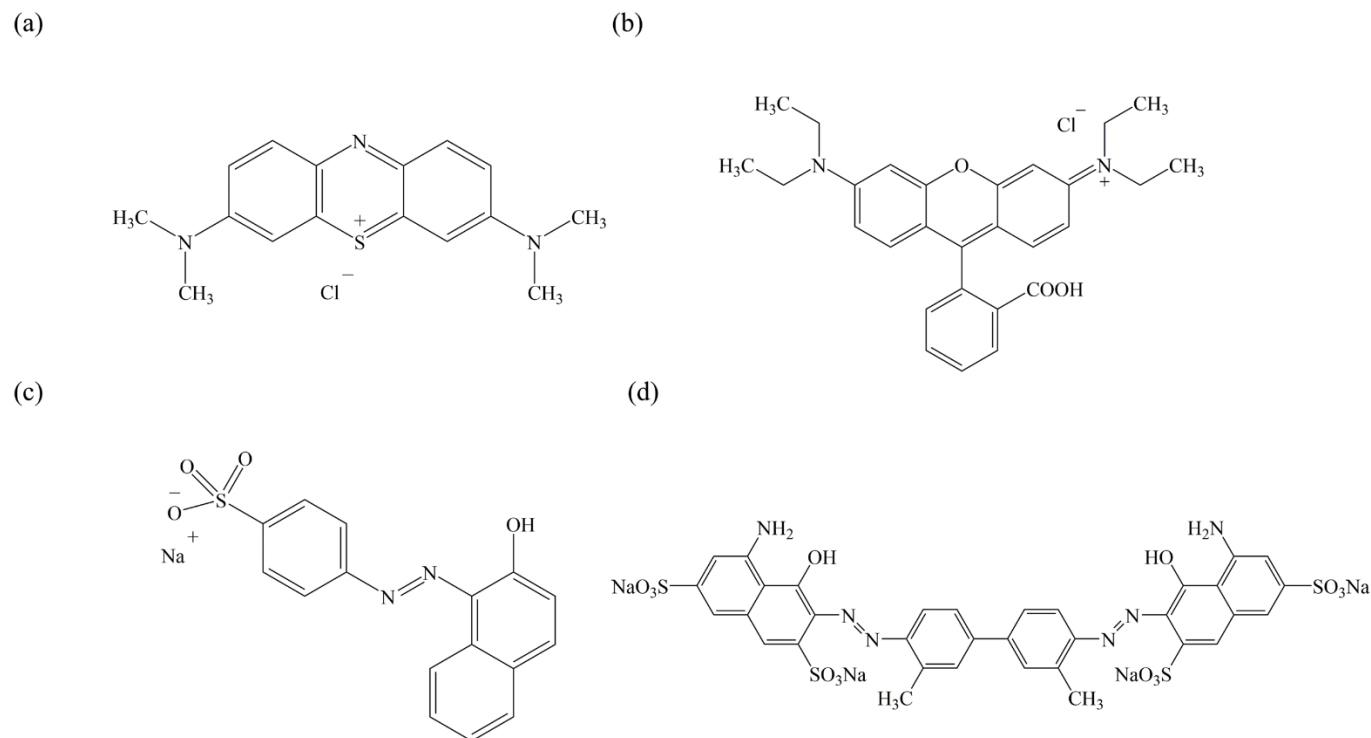

**Figure S1.** Chemical structures of dyes: (a) methylene blue (MB); (b) Rhodamine B (RhB); (c) Orange II (OI); (d) trypan Blue (TB).
